# Supplementary material for: Self-Rated Effectiveness of Ayahuasca and Breathwork on Well-Being, Psychological Resilience, Self-Compassion, and Personality: An Observational Comparison Study
Source: MDPI journal article supplement (doi:10.3390/psychoactives3020011), 2024-03-31
Supplement: s1 [file s1]

Supplementary material

Table S1. ‘Other’ motivations listed by participants to attend the ayahuasca retreat or the breathwork session (*\*the three motivations that were listed; \*\*the name was replaced with ‘X’*)

| Ayahuasca group                                                                                                                                                                                                                                                                                                                                                                                                                                                                                                                                                                                                                                                                                                                                                                                                                                                                                             | Breathwork group                                                                                                                                                                                                                                                                                                                                                                                                                                                                                                                                                                                                                                                                                     |
|-------------------------------------------------------------------------------------------------------------------------------------------------------------------------------------------------------------------------------------------------------------------------------------------------------------------------------------------------------------------------------------------------------------------------------------------------------------------------------------------------------------------------------------------------------------------------------------------------------------------------------------------------------------------------------------------------------------------------------------------------------------------------------------------------------------------------------------------------------------------------------------------------------------|------------------------------------------------------------------------------------------------------------------------------------------------------------------------------------------------------------------------------------------------------------------------------------------------------------------------------------------------------------------------------------------------------------------------------------------------------------------------------------------------------------------------------------------------------------------------------------------------------------------------------------------------------------------------------------------------------|
| <ol style="list-style-type: none"> <li>1. To heal</li> <li>2. To learn</li> <li>3. To get the best out of myself</li> <li>4. To process the loss of someone</li> <li>5. Spirituality</li> <li>6. There is a continuing story in every trip, I want to see where it leads</li> <li>7. To be the best version of myself and to be a better coach for others</li> <li>8. To get a better spiritual view of myself in relation to others</li> <li>9. To get guidance and insights</li> <li>10. To get new insight;</li> <li>11. To go out of my comfort zone</li> <li>12. To make my intentions stronger</li> <li>13. To provide insights into myself to be able to grow</li> <li>14. To step into another world</li> <li>15. To understand life, to find my strength to find the truth to find my inner voice to connect</li> <li>16. Come to an understanding</li> <li>17. Being free (er) in life</li> </ol> | <ol style="list-style-type: none"> <li>1. All of the above*</li> <li>2. Enjoying breathing and curious about what would be so special within the breath work on this</li> <li>3. It's a calling of the soul</li> <li>4. Self-care and preservation</li> <li>5. To break through blockades</li> <li>6. To clear shit we gather through days, weeks, months</li> <li>7. To come back to my inner peace</li> <li>8. To dive deeper into the world of spirituality</li> <li>9. To find relaxation and peace</li> <li>10. To learn to trust my inner voice more</li> <li>11. To specify 'problems' : I'm trying to move in a positive direction</li> <li>12. To support ‘X’** and the research</li> </ol> |

Table S2. Total number of participants that completed the surveys per timepoint and group; *AG= Ayahuasca Group, BG= Breathwork Group; \*refers to differences in missing values in the five personality scales*

|                 | T0 |        | T1     |        | T6 |    | T12    |        |
|-----------------|----|--------|--------|--------|----|----|--------|--------|
|                 | AG | BG     | AG     | BG     | AG | BG | AG     | BG     |
| Well-being      | 62 | 30     | 52     | 22     | 42 | 17 | 44     | 16     |
| Resilience      | 68 | 26     | 54     | 22     | 43 | 18 | 44     | 17     |
| Self-Compassion | 67 | 30     | 54     | 22     | 42 | 18 | 43     | 18     |
| Personality     | 62 | 29-30* | 52-53* | 21-22* | 42 | 17 | 43-44* | 15-16* |
